# Supplementary figures and images for: Birth order dependent growth cone segregation determines synaptic layer identity in the Drosophila visual system
Source: eLife journal article supplement (doi:10.7554/elife.13715), 2016-03-17

**Figure 6-figure supplement 1**

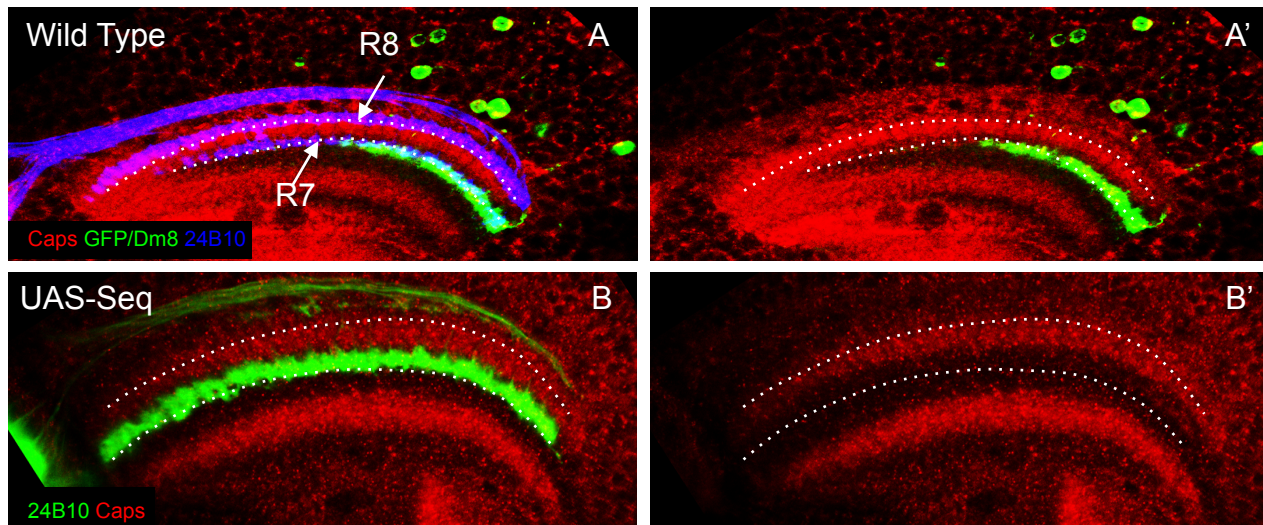

Supplement: supp [file elife-13715-supp-v1.zip]

Figure 2-figure supplement 1

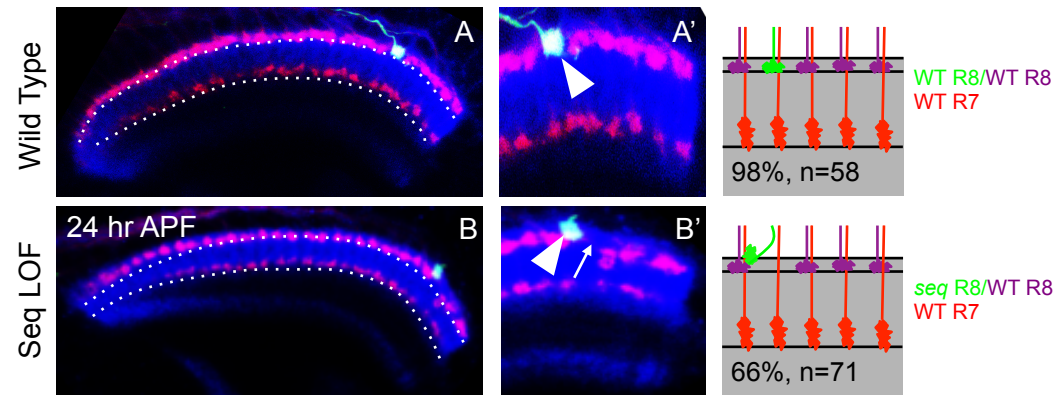

Supplement: supp [file elife-13715-supp-v1.zip]

**Figure 5-figure supplement 1**

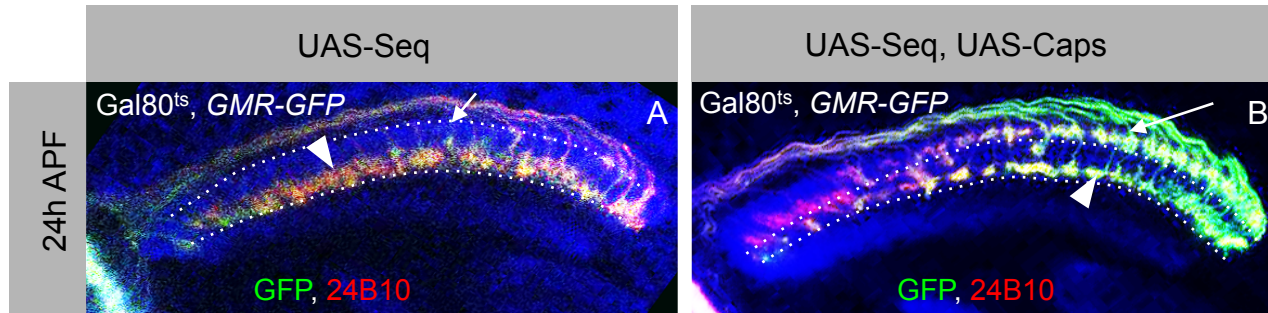

Supplement: supp [file elife-13715-supp-v1.zip]

Figure 1-figure supplement 1

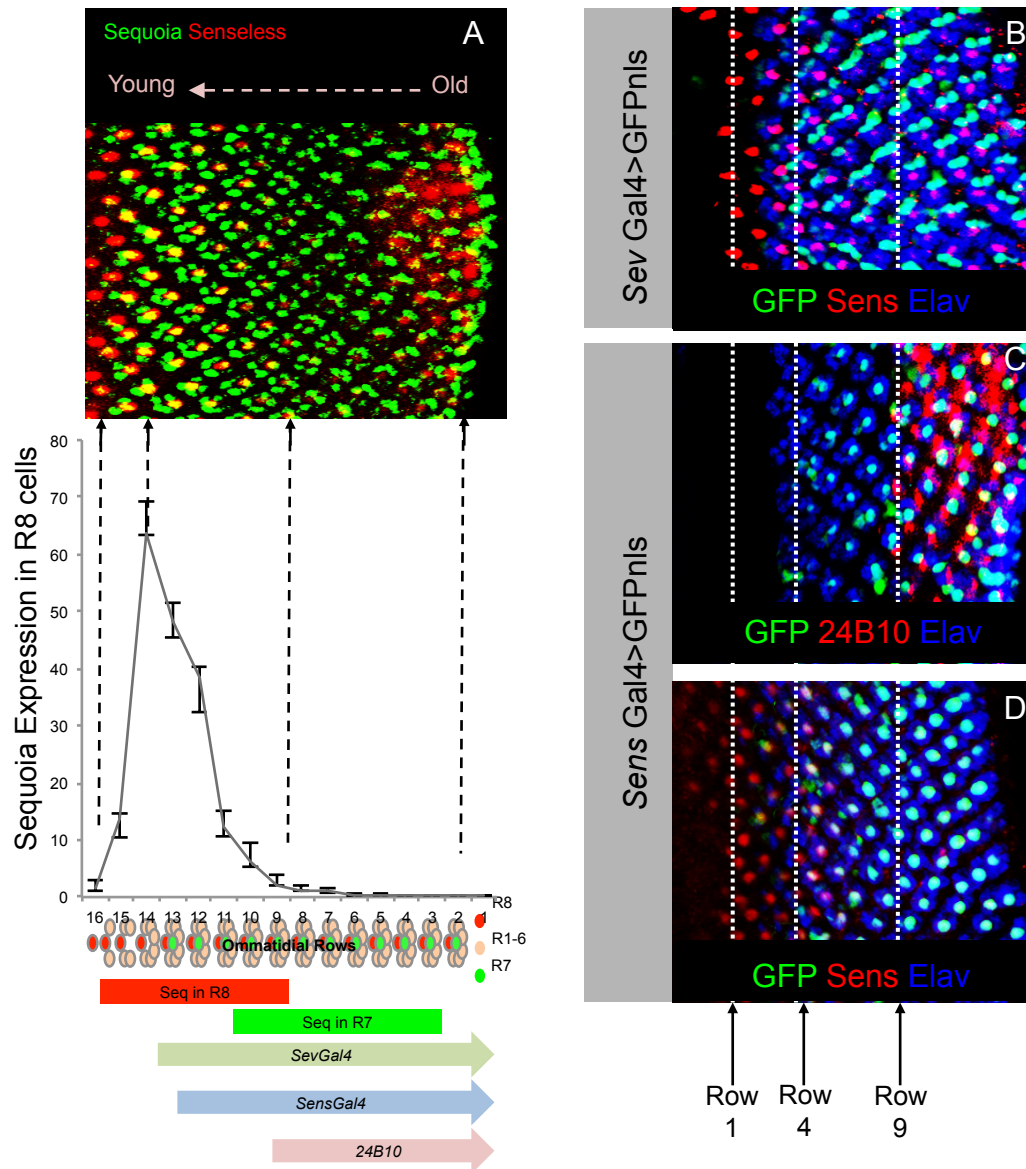

Supplement: supp [file elife-13715-supp-v1.zip]

Figure 6-figure supplement 2

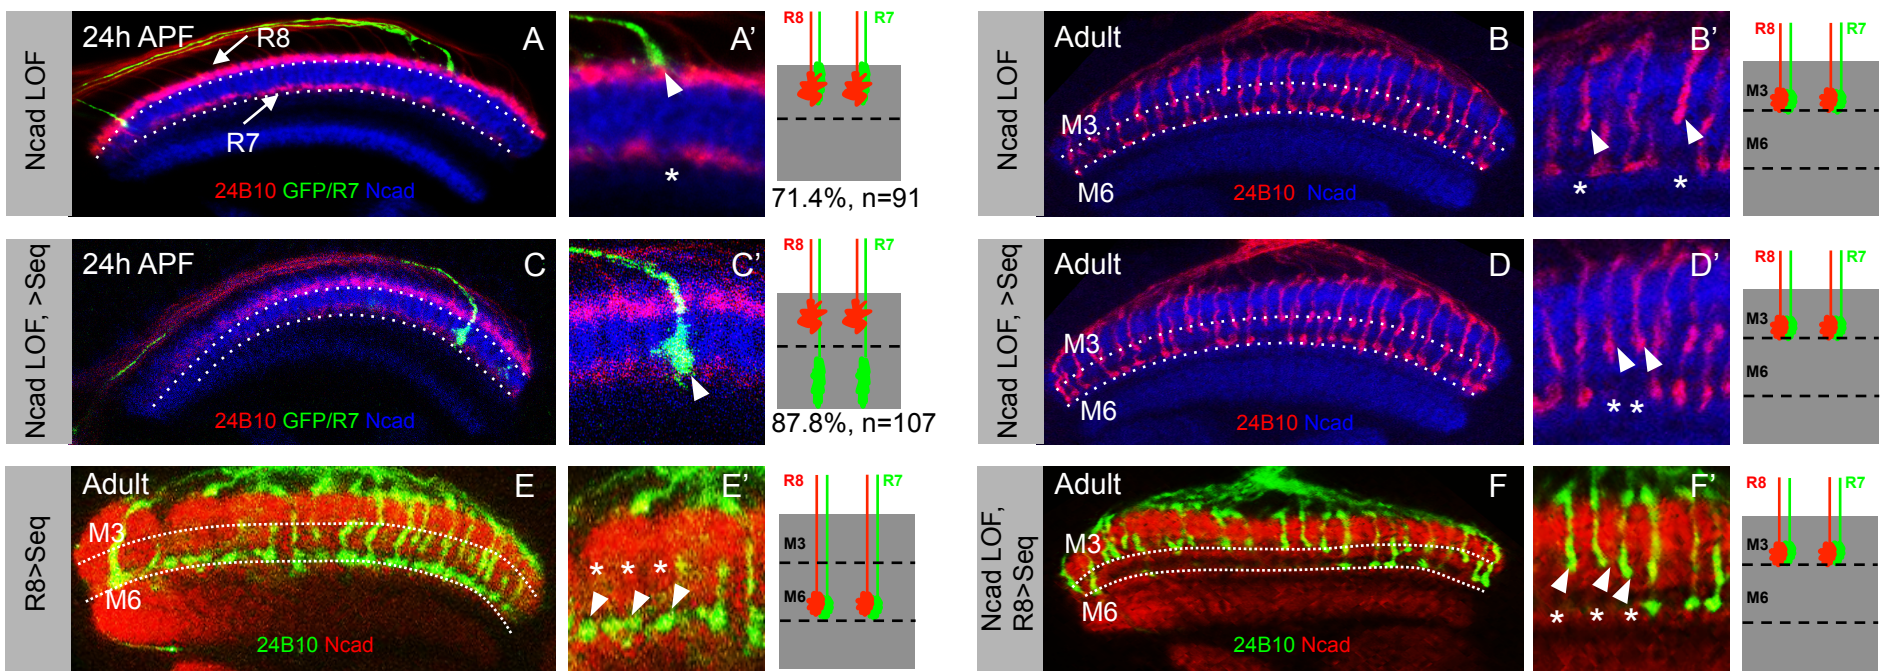

Supplement: supp [file elife-13715-supp-v1.zip]

**Figure 4-figure supplement 1**

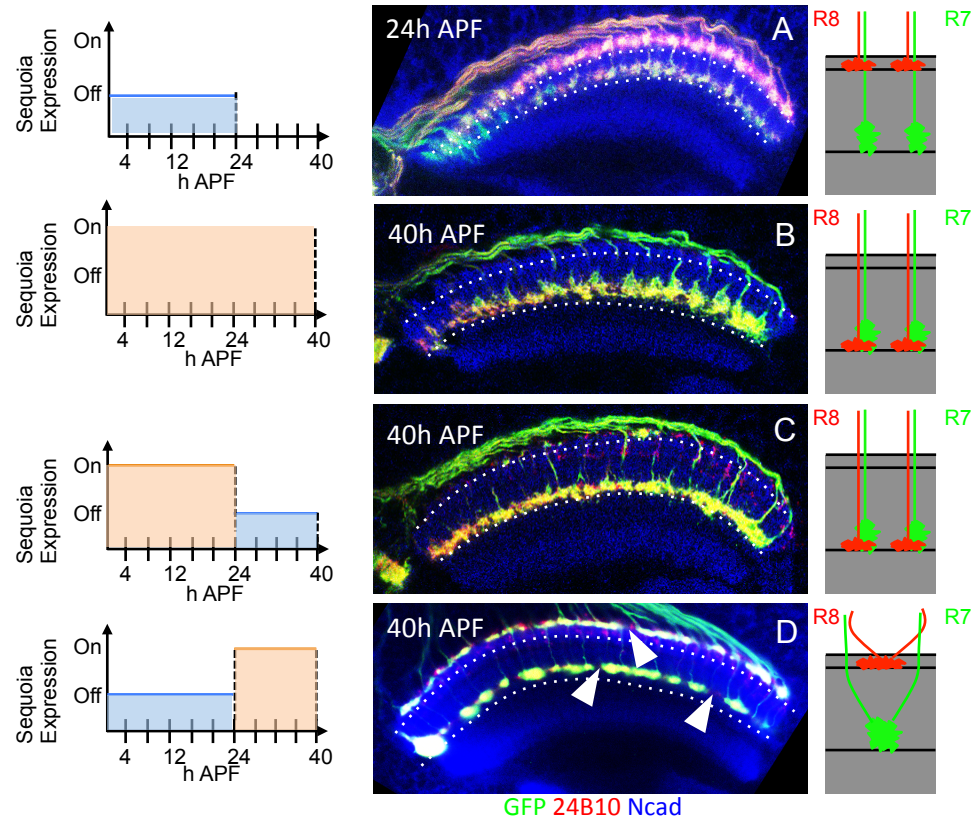

Supplement: supp [file elife-13715-supp-v1.zip]

**Figure 3-figure supplement 1**

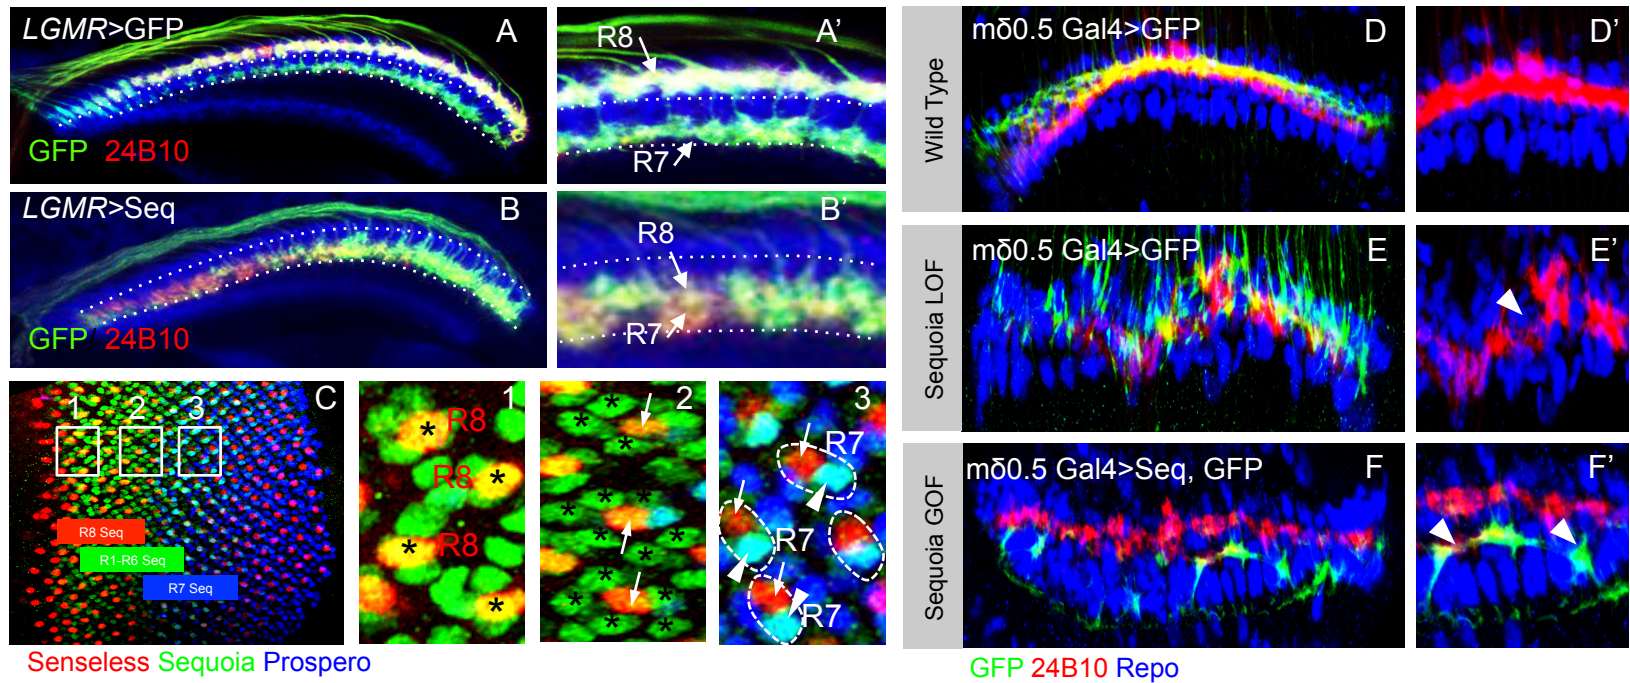

Supplement: supp [file elife-13715-supp-v1.zip]
